# Supplementary material for: Volatile Profiling Aided in the Isolation of Anti-Proliferative Lupeol from the Roots of Clinacanthus nutans (Burm. f.) Lindau
Source: MDPI journal article supplement (doi:10.3390/pr9081383), 2021-08-09
Supplement: s1 [file s1]

# Supplemental Information 1A: <sup>1</sup>H-NMR spectrum of the isolated compound from *C. nutans* roots.

Angelina\_sample 1 : Lupeol 1 in CDCl<sub>3</sub>  
proto

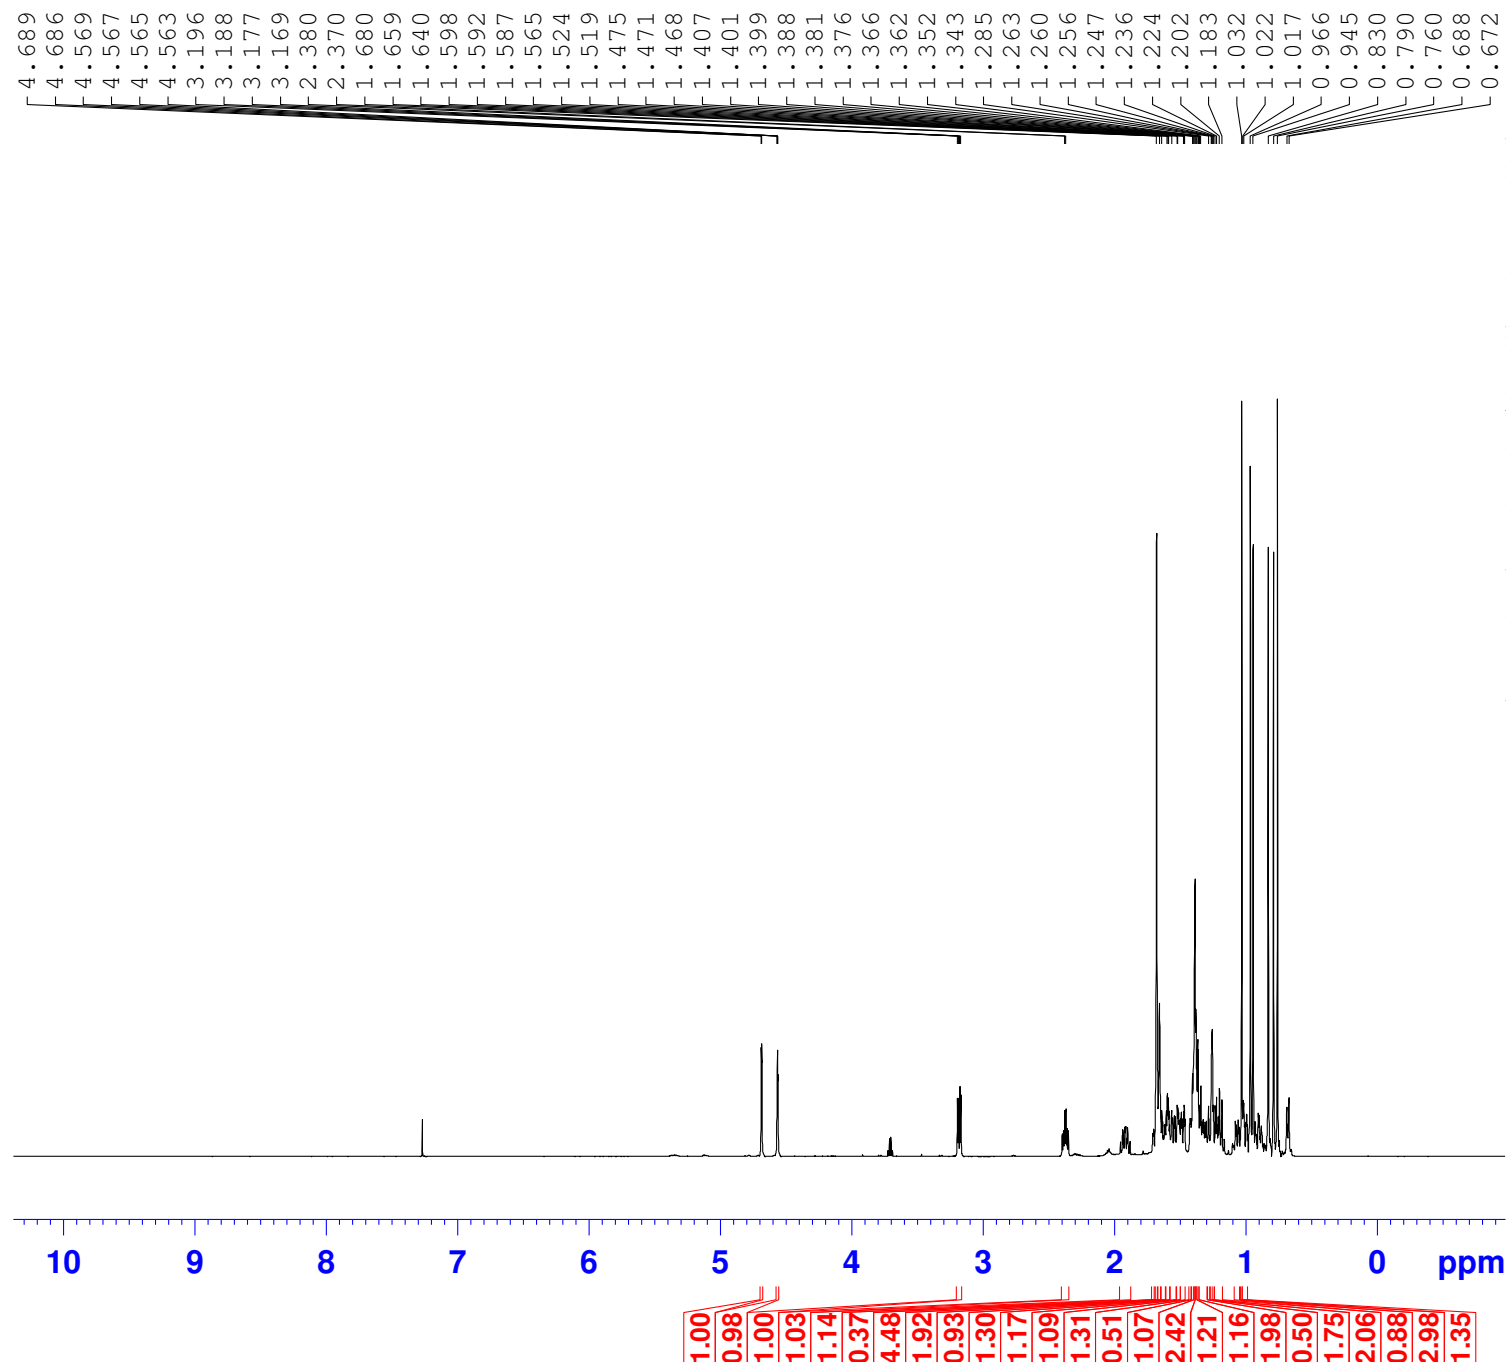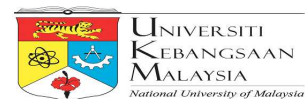

NAME Angelina\_sample 1 Lupeol 1  
EXPNO 11  
PROCNO 1  
Date\_ 20160428  
Time 16.10  
INSTRUM spect  
PROBHD 5 mm PABBO BB-  
PULPROG zg30  
TD 65536  
SOLVENT CDCl<sub>3</sub>  
NS 16  
DS 2  
SWH 12335.526 Hz  
FIDRES 0.188225 Hz  
AQ 2.6564426 sec  
RG 101  
DW 40.533 usec  
DE 6.50 usec  
TE 298.1 K  
D1 1.00000000 sec  
TD0 1

===== CHANNEL f1 =====  
NUC1 1H  
P1 12.75 usec  
PL1 -3.80 dB  
PL1W 31.75489044 W  
SFO1 600.3037071 MHz  
SI 32768  
SF 600.3000098 MHz  
WDW EM  
SSB 0  
LB 0.30 Hz  
GB 0  
PC 1.00

# Supplemental Information 1B: <sup>13</sup>C-NMR spectrum of the isolated compound from *C. nutans* roots.

Angelina\_sample 1 : Lupeol 1 in CDCl<sub>3</sub>  
<sup>13</sup>C

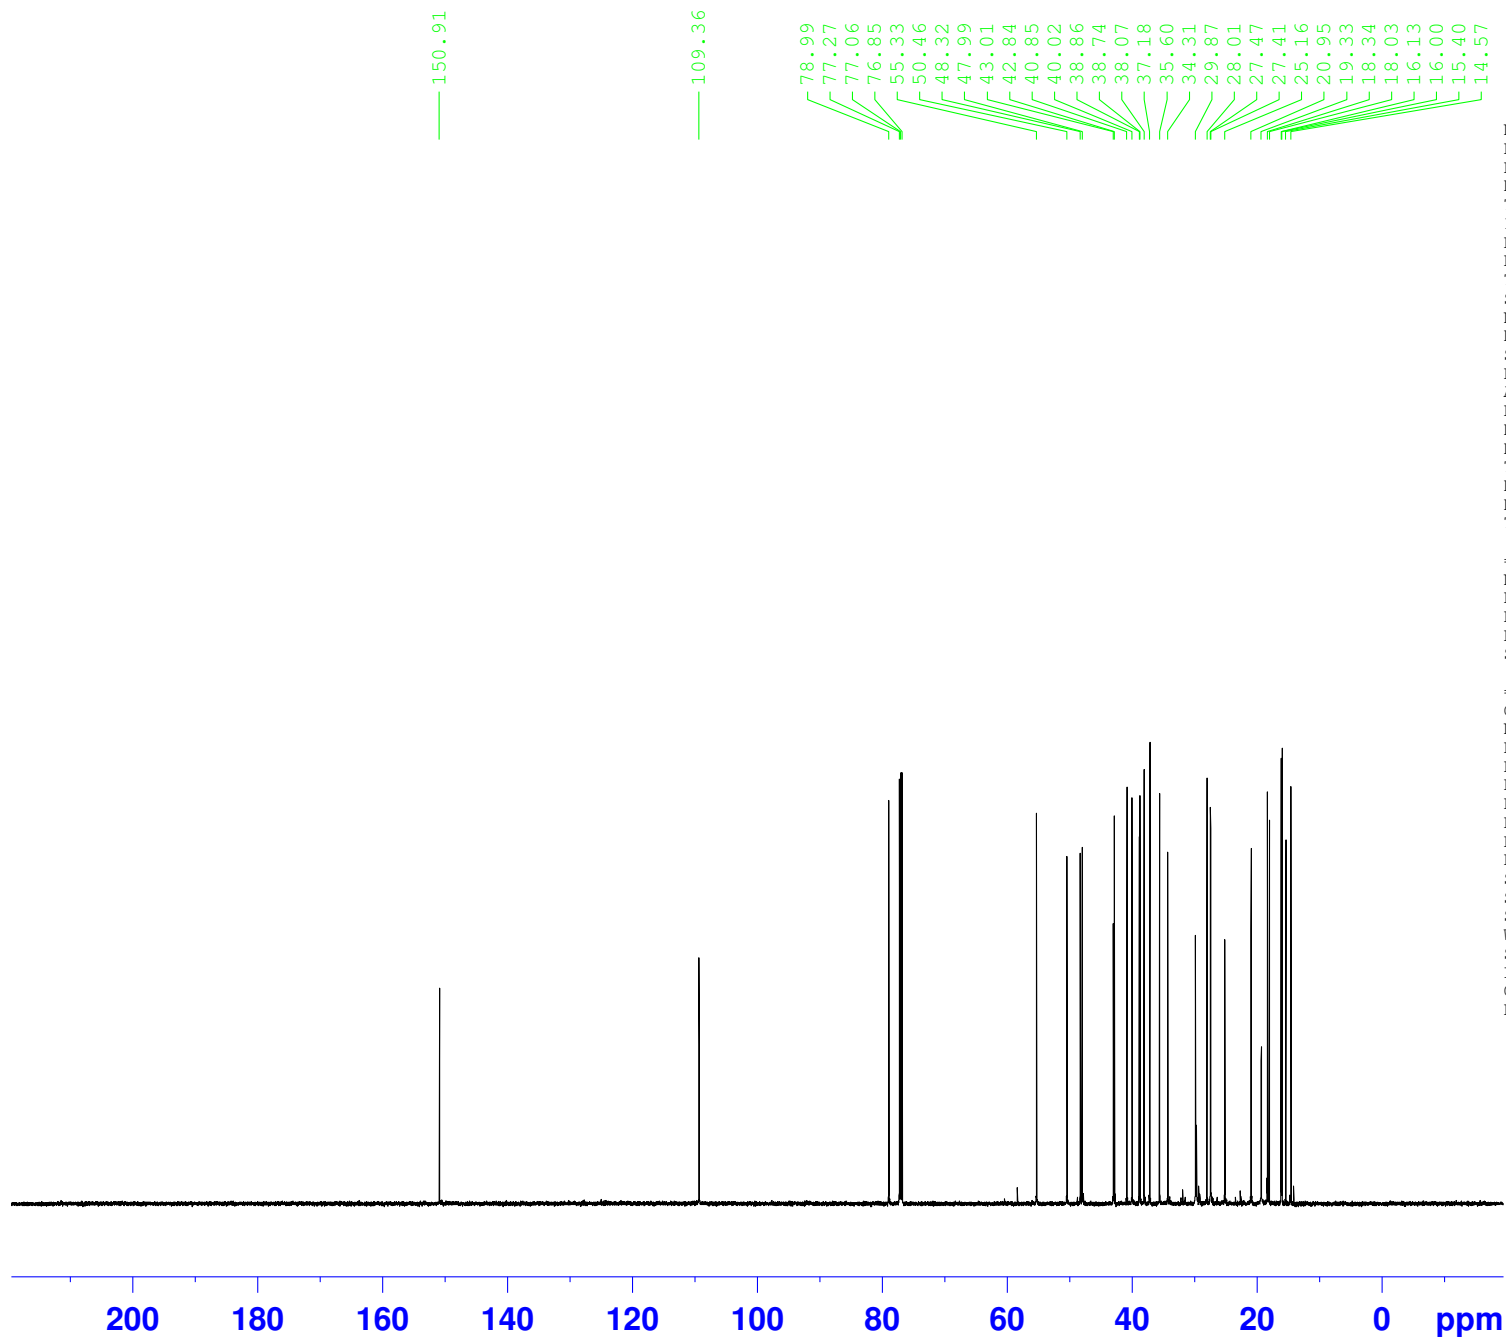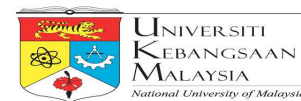

NAME Angelina\_sample 1 Lupeol 1  
EXPNO 20  
PROCNO 1  
Date\_ 20160428  
Time 21.31  
INSTRUM spect  
PROBHD 5 mm PABBO BB-  
PULPROG zgpg30  
TD 65536  
SOLVENT CDCl<sub>3</sub>  
NS 5120  
DS 4  
SWH 36057.691 Hz  
FIDRES 0.550197 Hz  
AQ 0.9088159 sec  
RG 203  
DW 13.867 usec  
DE 6.50 usec  
TE 298.5 K  
D1 2.00000000 sec  
D11 0.03000000 sec  
TDO 1

===== CHANNEL f1 =====  
NUC1 <sup>13</sup>C  
P1 10.00 usec  
PL1 1.80 dB  
PL1W 68.20902252 W  
SFO1 150.9606496 MHz

===== CHANNEL f2 =====  
CPDPRG2 waltz16  
NUC2 <sup>1</sup>H  
PCPD2 80.00 usec  
PL2 -3.80 dB  
PL12 12.15 dB  
PL13 17.00 dB  
PL2W 31.75489044 W  
PL12W 0.80688316 W  
PL13W 0.26412567 W  
SFO2 600.3024012 MHz  
SI 32768  
SF 150.9455550 MHz  
WDW EM  
SSB 0  
LB 1.00 Hz  
GB 0  
PC 1.40
