# Supplementary material for: Volatile Profiling Aided in the Isolation of Anti-Proliferative Lupeol from the Roots of Clinacanthus nutans (Burm. f.) Lindau
Source: MDPI journal article supplement (doi:10.3390/pr9081383), 2021-08-09
Supplement: s1 [file s1]

### Supplemental Figures

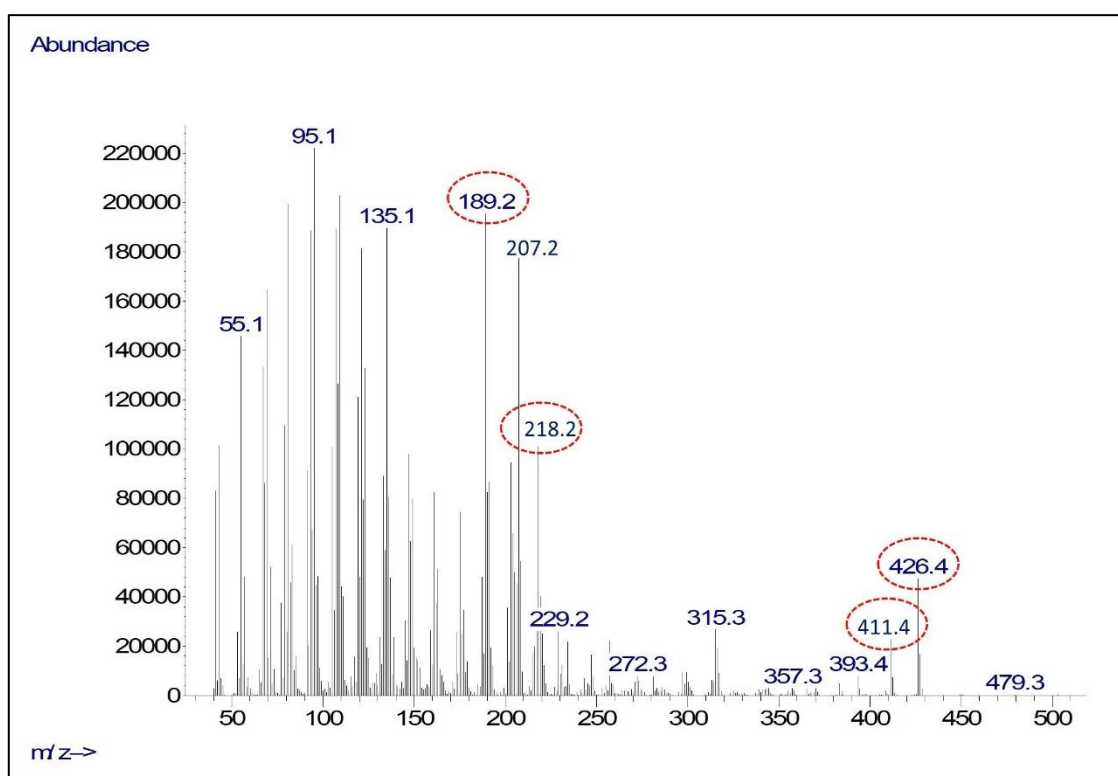

**Supplemental Figure S1A.** The electron ionization-mass spectrum (EI-MS) of the single main peak at retention time 28.932 min of the total ion chromatogram of the isolated white amorphous compound from *C. nutans* roots.

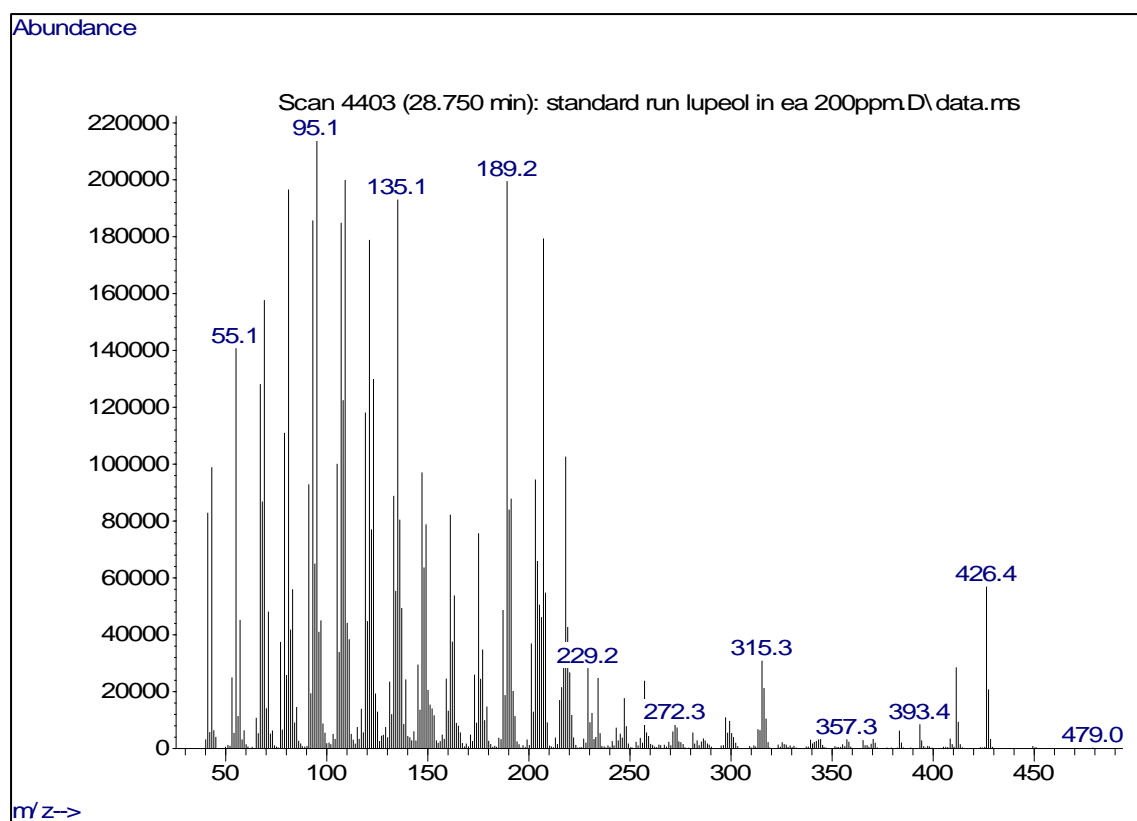

**Supplemental Figure S1B.** The electron ionization-mass spectrum (EI-MS) of authentic lupeol.

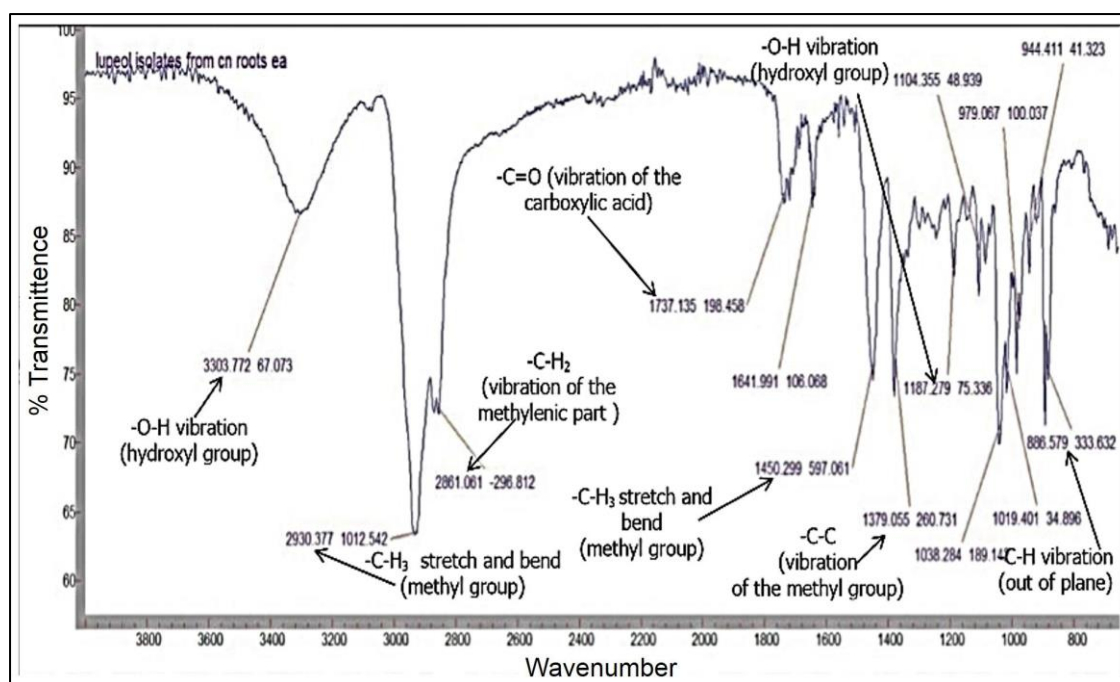

**Supplemental Figure S2.** Fourier-transform infrared spectrum (FTIR) of the white amorphous compound (lupeol) isolated from *C. nutans* roots re-dissolved in chloroform (CHCl<sub>3</sub>, final concentration = 1000 µg/mL).

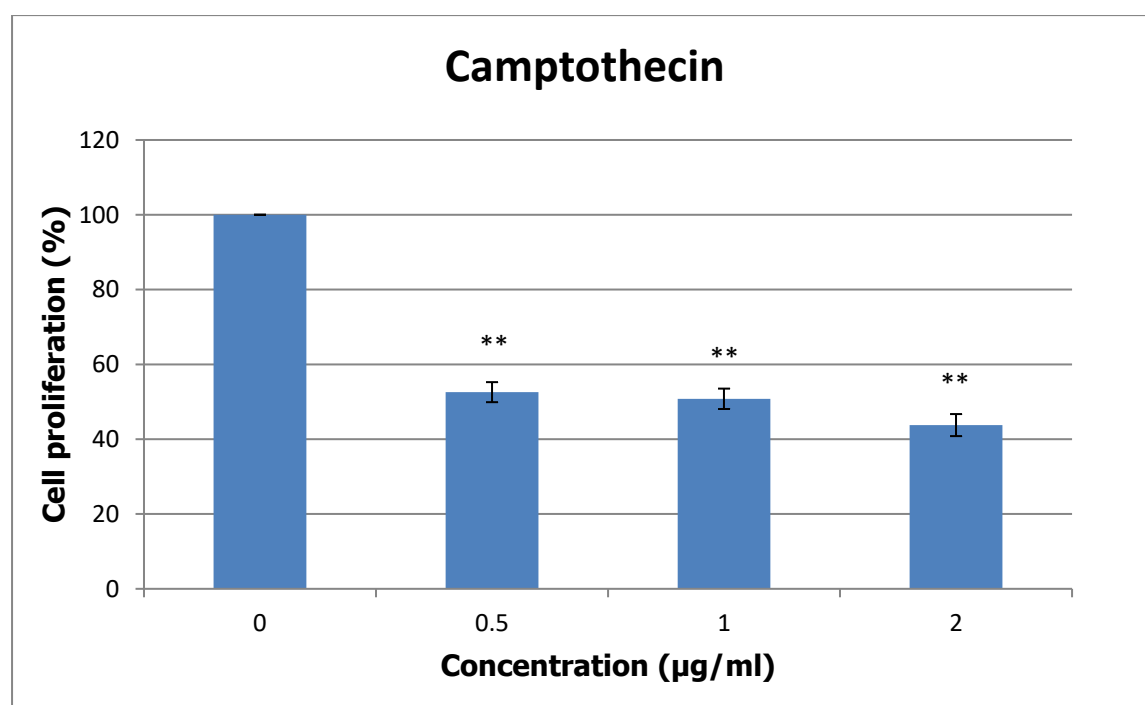

**Supplemental Figure S3.** Cytotoxicity assay of camptothecin against MCF-7 cell lines. The IC<sub>50</sub> values were expressed as mean ± SD of the three independent experiments (n = 3). Level of significance (\*p < 0.05, \*\*p < 0.01 and \*\*\*p < 0.001) for each concentration was compared to the control cells, and was determined using One-way ANOVA followed by post hoc Dunnett test.
